# Supplementary material
Source: PubMed Central journal article supplement (PMC9210550)
Supplement: NIHMS1799041-supplement-10.pdf [file NIHMS1799041-supplement-10.pdf]

**Table S1 EM data and refinement, related to Figures 1, 4, S1-S6, and STAR Methods.**

|                                                                 | NEXT-substrate 1 complex |                   |                                                                 | NEXT-substrate 2 complex |                   |                   | Apo-NEXT          |
|-----------------------------------------------------------------|--------------------------|-------------------|-----------------------------------------------------------------|--------------------------|-------------------|-------------------|-------------------|
| Data collection                                                 | Dataset 1 (MSKCC)        | Dataset 2 (MSKCC) | Data collection                                                 | Dataset 1 (NYSBC)        | Dataset 2 (MSKCC) | Dataset 3 (MSKCC) | Dataset 1 (MSKCC) |
| Magnification                                                   | 22,500x                  | 22,500x           | Magnification                                                   | 22,500x                  | 22,500x           | 22,500x           | 22,500x           |
| Voltage (kV)                                                    | 300                      | 300               | Voltage (kV)                                                    | 300                      | 300               | 300               | 300               |
| Electron exposure (e-/Å <sup>2</sup> )                          | 67.6                     | 67.6              | Electron exposure (e-/Å <sup>2</sup> )                          | 77.5                     | 66                | 66                | 67.6              |
| Defocus range (µm)                                              | -1.0 to -3.0             | -1.0 to -3.0      | Defocus range (µm)                                              | -1.0 to -3.0             | -1.0 to -3.0      | -1.0 to -3.0      | -1.0 to -3.0      |
| Super-resolution pixel size (Å)                                 | 0.544                    | 0.544             | Super-resolution pixel size (Å)                                 | 0.55                     | 0.534             | 0.532             | 0.544             |
| Fourier cropped pixel size (Å)                                  | 1.088                    | 1.088             | Fourier cropped pixel size (Å)                                  | 1.1                      | 1.1               | 1.1               | 1.088             |
| Initial particle projections (#)                                | 960,423                  |                   | Initial particle projections (#)                                | 822,892                  |                   |                   | 465,038           |
| Final particle projections (#)                                  |                          |                   | Final particle projections (#)                                  |                          |                   |                   |                   |
| Overall map                                                     | 614,412                  |                   | Overall map                                                     | 252,638                  |                   |                   | 52,777            |
| Focused Refinement (Foc. Ref.) MTR4 (A)                         | 225,213                  |                   | Foc. Ref. MTR4 <sup>core</sup>                                  | 252,638                  |                   |                   |                   |
| Foc. Ref. MTR4 (B)                                              | 37,088                   |                   | Foc. Ref. MTR4 <sup>core</sup> -ZCCHC8 <sup>PSP</sup> -RBM7-RNA | 252,638                  |                   |                   |                   |
| Foc. Ref. MTR4 <sup>KOW</sup> -ZCCHC8 <sup>HD</sup> KID (CC-1)  | 117,561                  |                   | Foc. Ref. RBM7-ZCCHC8 <sup>PSP</sup> -RNA                       | 252,638                  |                   |                   |                   |
| Foc. Ref. MTR4 <sup>core</sup> -ZCCHC8 <sup>PSP</sup> -RBM7 (A) | 44,800                   |                   | Foc. Ref. MTR4-ZCCHC8 <sup>HD</sup> KID                         | 252,638                  |                   |                   |                   |
| Foc. Ref. MTR4 <sup>core</sup> -ZCCHC8 <sup>PSP</sup> -RBM7 (B) | 37,088                   |                   | Foc. Ref. MTR4 <sup>KOW</sup> -ZCCHC8 <sup>HD</sup> KID         | 252,638                  |                   |                   |                   |
| Symmetry imposed                                                | C1                       |                   | Symmetry imposed                                                | C1                       |                   |                   | C1                |
| Map resolution (Å)                                              |                          |                   | Map resolution (Å)                                              |                          |                   |                   |                   |
| FSC threshold = 0.143                                           |                          |                   | FSC threshold = 0.143                                           |                          |                   |                   |                   |
| Overall map                                                     | 4.06                     |                   | Overall map                                                     | 3.62                     |                   |                   | 8.36              |
| Focused Refinement (Foc. Ref.) MTR4 (A)                         | 3.42                     |                   | Foc. Ref. MTR4 <sup>core</sup>                                  | 3.50                     |                   |                   |                   |
| Foc. Ref. MTR4 (B)                                              | 3.54                     |                   | Foc. Ref. MTR4 <sup>core</sup> -ZCCHC8 <sup>MR</sup> -RBM7-RNA  | 3.42                     |                   |                   |                   |
| Foc. Ref. MTR4 <sup>KOW</sup> -ZCCHC8 <sup>HD</sup> KID         | 3.26                     |                   | Foc. Ref. RBM7-ZCCHC8 <sup>MR</sup> -RNA                        | 3.94                     |                   |                   |                   |
| Foc. Ref. MTR4 <sup>core</sup> -ZCCHC8 <sup>MR</sup> -RBM7 (A)  | 4.26                     |                   | Foc. Ref. MTR4-ZCCHC8 <sup>HD</sup> KID                         | 3.62                     |                   |                   |                   |
| Foc. Ref. MTR4 <sup>core</sup> -ZCCHC8 <sup>MR</sup> -RBM7 (B)  | 4.40                     |                   | Foc. Ref. MTR4 <sup>KOW</sup> -ZCCHC8 <sup>HD</sup> KID         | 3.34                     |                   |                   |                   |
| Map resolution range (Å)                                        |                          |                   | Map resolution range (Å)                                        |                          |                   |                   |                   |
| Overall map                                                     | 3.24 – 5.23              |                   | Overall map                                                     | 3.00 – 6.56              |                   |                   | 6.52-13.1         |
| Focused Refinement (Foc. Ref.) MTR4 (A)                         | 3.06 – 6.05              |                   | Foc. Ref. MTR4 <sup>core</sup>                                  | 2.80 – 5.25              |                   |                   |                   |
| Foc. Ref. MTR4 (B)                                              | 3.02 – 5.26              |                   | Foc. Ref. MTR4 <sup>core</sup> -ZCCHC8 <sup>MR</sup> -RBM7-RNA  | 2.73 – 5.03              |                   |                   |                   |
| Foc. Ref. MTR4 <sup>KOW</sup> -ZCCHC8 <sup>HD</sup> KID         | 2.96 – 7.56              |                   | Foc. Ref. RBM7-ZCCHC8 <sup>MR</sup> -RNA                        | 3.05 – 7.00              |                   |                   |                   |
| Foc. Ref. MTR4 <sup>core</sup> -ZCCHC8 <sup>MR</sup> -RBM7 (A)  | 3.40 – 6.28              |                   | Foc. Ref. MTR4-ZCCHC8 <sup>HD</sup> KID                         | 2.84 – 4.75              |                   |                   |                   |
| Foc. Ref. MTR4 <sup>core</sup> -ZCCHC8 <sup>MR</sup> -RBM7 (B)  | 3.71 – 8.58              |                   | Foc. Ref. MTR4 <sup>KOW</sup> -ZCCHC8 <sup>HD</sup> KID         | 2.82 – 4.82              |                   |                   |                   |
| <b>Refinement</b>                                               |                          |                   | <b>Refinement</b>                                               |                          |                   |                   |                   |
| Initial model used (PDB code)                                   | 6C90, 5LXR               |                   | Initial model used (PDB code)                                   | 6C90, 5LXR               |                   |                   |                   |
| Model resolution (Å)                                            | 3.57                     |                   | Model resolution (Å)                                            | 3.74                     |                   |                   |                   |
| FSC threshold = 0.5                                             |                          |                   | FSC threshold = 0.5                                             |                          |                   |                   |                   |
| Map sharpening B factor (Å <sup>2</sup> )                       |                          |                   | Map sharpening B factor (Å <sup>2</sup> )                       |                          |                   |                   |                   |
| Overall map                                                     | -104                     |                   | Overall map                                                     | -126                     |                   |                   | -429              |
| Focused Refinement (Foc. Ref.) MTR4 (A)                         | -66                      |                   | Foc. Ref. MTR4 <sup>core</sup>                                  | -110                     |                   |                   |                   |
| Foc. Ref. MTR4 (B)                                              | -82                      |                   | Foc. Ref. MTR4 <sup>core</sup> -ZCCHC8 <sup>PSP</sup> -RBM7-RNA | -98                      |                   |                   |                   |
| Foc. Ref. MTR4 <sup>KOW</sup> -ZCCHC8 <sup>HD</sup> KID         | -54                      |                   | Foc. Ref. RBM7-ZCCHC8 <sup>PSP</sup> -RNA                       | -153                     |                   |                   |                   |
| Foc. Ref. MTR4 <sup>core</sup> -ZCCHC8 <sup>PSP</sup> -RBM7 (A) | -80                      |                   | Foc. Ref. MTR4-ZCCHC8 <sup>HD</sup> KID                         | -113                     |                   |                   |                   |
| Foc. Ref. MTR4 <sup>core</sup> -ZCCHC8 <sup>PSP</sup> -RBM7 (B) | -91                      |                   | Foc. Ref. MTR4 <sup>KOW</sup> -ZCCHC8 <sup>HD</sup> KID         | -128                     |                   |                   |                   |
| <b>Model composition</b>                                        |                          |                   | <b>Model composition</b>                                        |                          |                   |                   |                   |
| Non-hydrogen atoms                                              | 22,217                   |                   | Non-hydrogen atoms                                              | 13,851                   |                   |                   |                   |
| Protein residues                                                | 2,709                    |                   | Protein residues                                                | 1,629                    |                   |                   |                   |
| Nucleic acid residues                                           | 22                       |                   | Nucleic acid residues                                           | 37                       |                   |                   |                   |
| Ligand (Zn <sup>2+</sup> )                                      | 2                        |                   | Ligand (Zn <sup>2+</sup> )                                      | 1                        |                   |                   |                   |
| <b>Mean B factors</b>                                           |                          |                   | <b>Mean B factors</b>                                           |                          |                   |                   |                   |
| Protein                                                         | 109.45                   |                   | Protein                                                         | 79.1                     |                   |                   |                   |
| Nucleic acid                                                    | 136.73                   |                   | Nucleic acid                                                    | 165.58                   |                   |                   |                   |
| Ligand (Zn <sup>2+</sup> )                                      | 255.2                    |                   | Ligand (Zn <sup>2+</sup> )                                      | 182.12                   |                   |                   |                   |
| <b>RMS deviations</b>                                           |                          |                   | <b>RMS deviations</b>                                           |                          |                   |                   |                   |
| Bond lengths (Å)                                                | 0.005                    |                   | Bond lengths (Å)                                                | 0.003                    |                   |                   |                   |
| Bond angles (°)                                                 | 0.917                    |                   | Bond angles (°)                                                 | 0.485                    |                   |                   |                   |
| <b>Validation</b>                                               |                          |                   | <b>Validation</b>                                               |                          |                   |                   |                   |
| Molprobity score                                                | 2.08                     |                   | Molprobity score                                                | 2.00                     |                   |                   |                   |
| Clashscore                                                      | 8.35                     |                   | Clashscore                                                      | 8.82                     |                   |                   |                   |
| Rotamer Outliers (%)                                            | 1.54                     |                   | Rotamer Outliers (%)                                            | 1.10                     |                   |                   |                   |
| C-beta deviations                                               | 0                        |                   | C-beta deviations                                               | 0                        |                   |                   |                   |
| <b>Ramachandran plot</b>                                        |                          |                   | <b>Ramachandran plot</b>                                        |                          |                   |                   |                   |
| % favored                                                       | 92.11                    |                   | % favored                                                       | 91.68                    |                   |                   |                   |
| % allowed                                                       | 7.89                     |                   | % allowed                                                       | 8.32                     |                   |                   |                   |
| % outliers                                                      | 0                        |                   | % outliers                                                      | 0                        |                   |                   |                   |

**Table S2. Sequences of primers used for qPCR analysis, Related to Figure 5 and Star Methods**

| <b>Name</b>             | <b>Sequence (5' to 3')</b> | <b>Manufacturer</b> |
|-------------------------|----------------------------|---------------------|
| GAPDH qPCR forward      | GTCAGCCGCATCTTCTTTTG       | IDT                 |
| GAPDH qPCR reverse      | GCGCCCAATACGACCAAATC       | IDT                 |
| proPOGZ qPCR forward    | AGTTCCAAGAAACCACACAC       | IDT                 |
| proPOGZ qPCR reverse    | GGTCGTTTGAGTGGACTAAC       | IDT                 |
| proEXT1 qPCR forward    | TCTAATGGCTGCAGGGAAAC       | IDT                 |
| proEXT1 qPCR reverse    | TAGCTGGGACAGTTGGCAAT       | IDT                 |
| proKLF6 qPCR forward    | AAGTTTTAGAGGGTCCGGCA       | IDT                 |
| proKLF6 qPCR reverse    | CTCTGCATAACCTTCACCGC       | IDT                 |
| proSERINC3 qPCR forward | GCAGAGTGAGAACGTCCCAT       | IDT                 |
| proSERINC3 qPCR reverse | GCATGGTTGCCTGTTTGAGA       | IDT                 |
| proTTC32 qPCR forward   | GTCTGTTCCACGGTCCAAAC       | IDT                 |
| proTTC32 qPCR reverse   | ACAGCAGGCATGTAGGGTAG       | IDT                 |
| proRBM39 qPCR forward   | AATAGATTTCCCTGTCATTTGGAGC  | IDT                 |
| proRBM39 qPCR reverse   | TTTCCAAGGTTGTTTCAAAGCTCG   | IDT                 |
