# Supplementary material
Source: PubMed Central journal article supplement (PMC9210550)

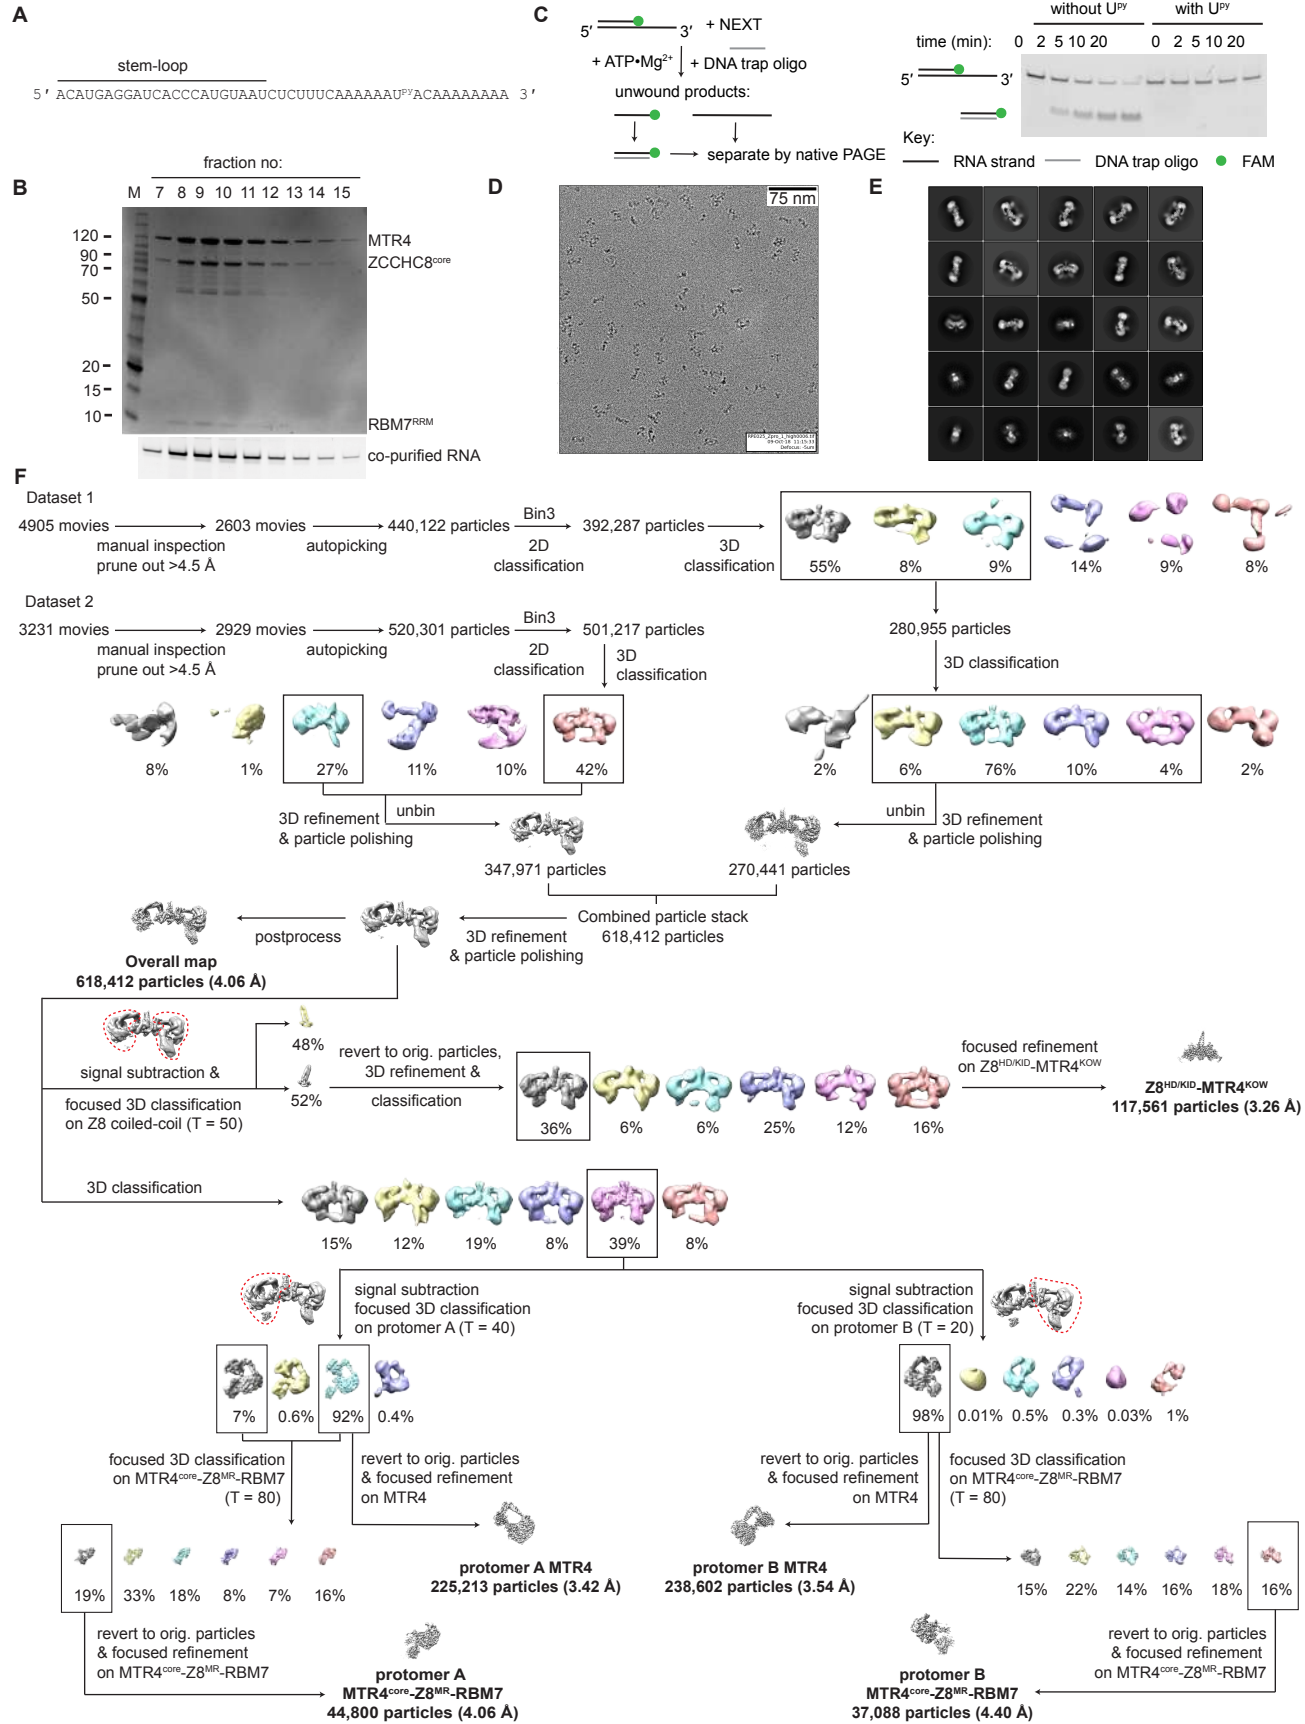

Supplement: NIHMS1799041-supplement-1.pdf [file NIHMS1799041-supplement-1.pdf]

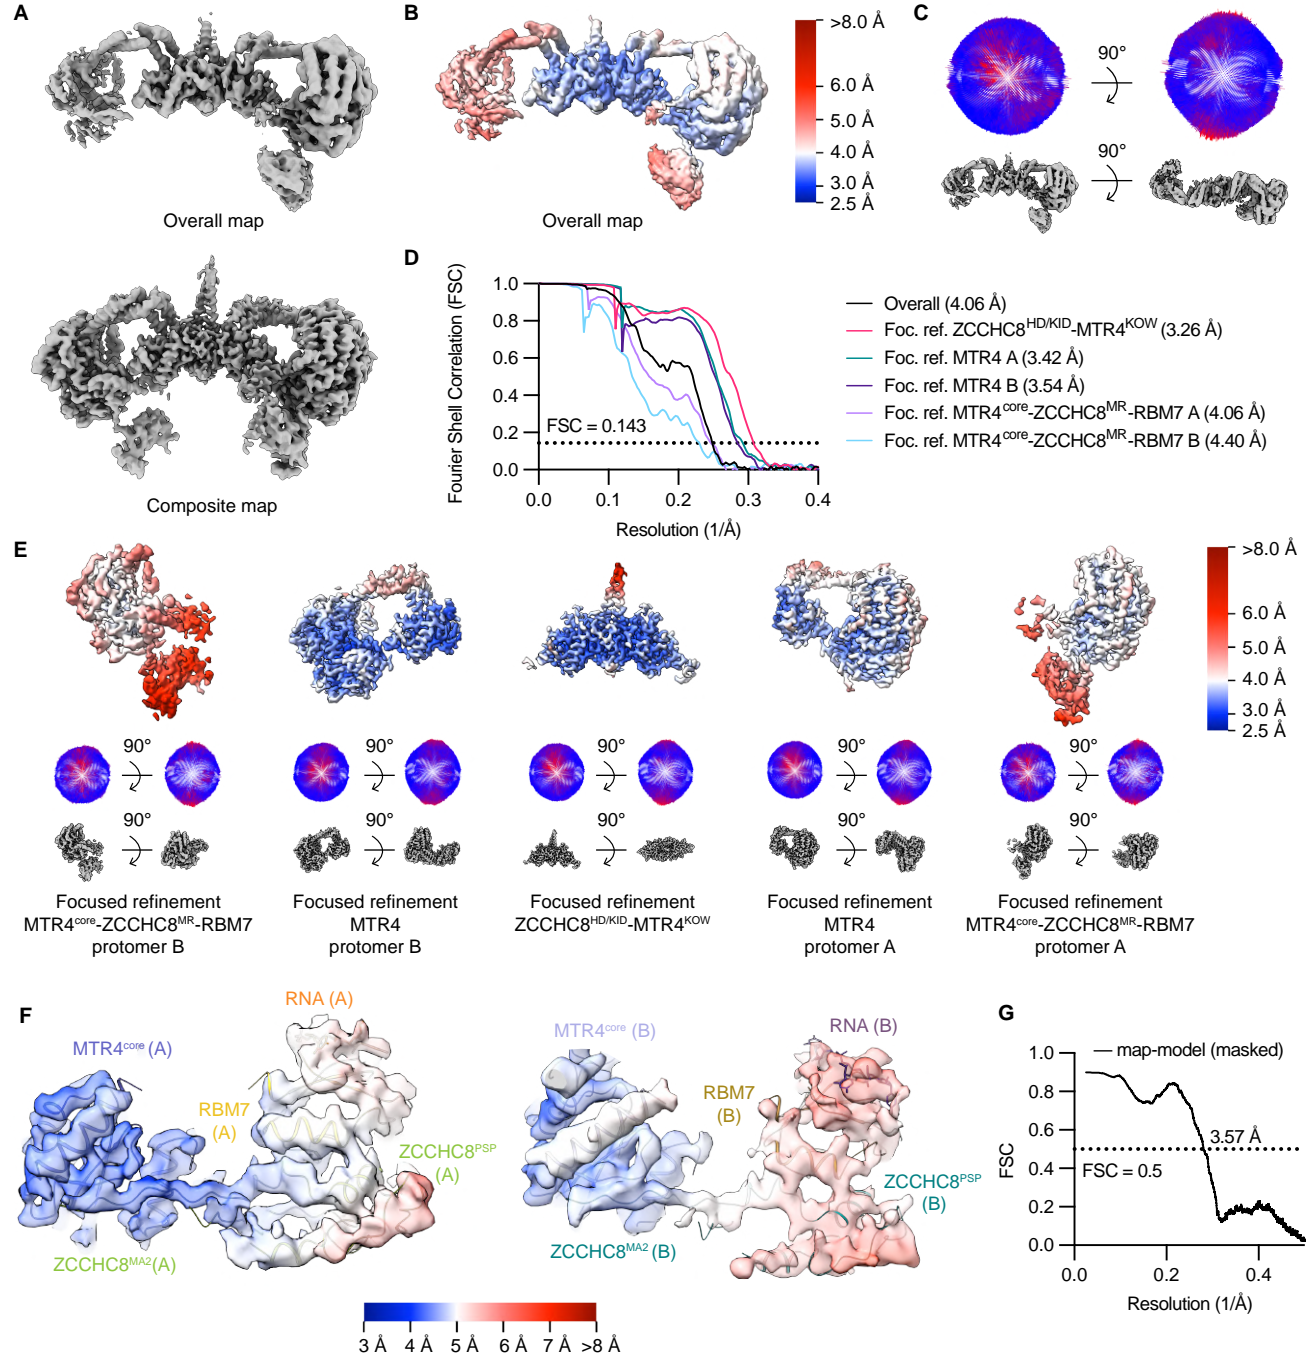

Supplement: NIHMS1799041-supplement-2.pdf [file NIHMS1799041-supplement-2.pdf]

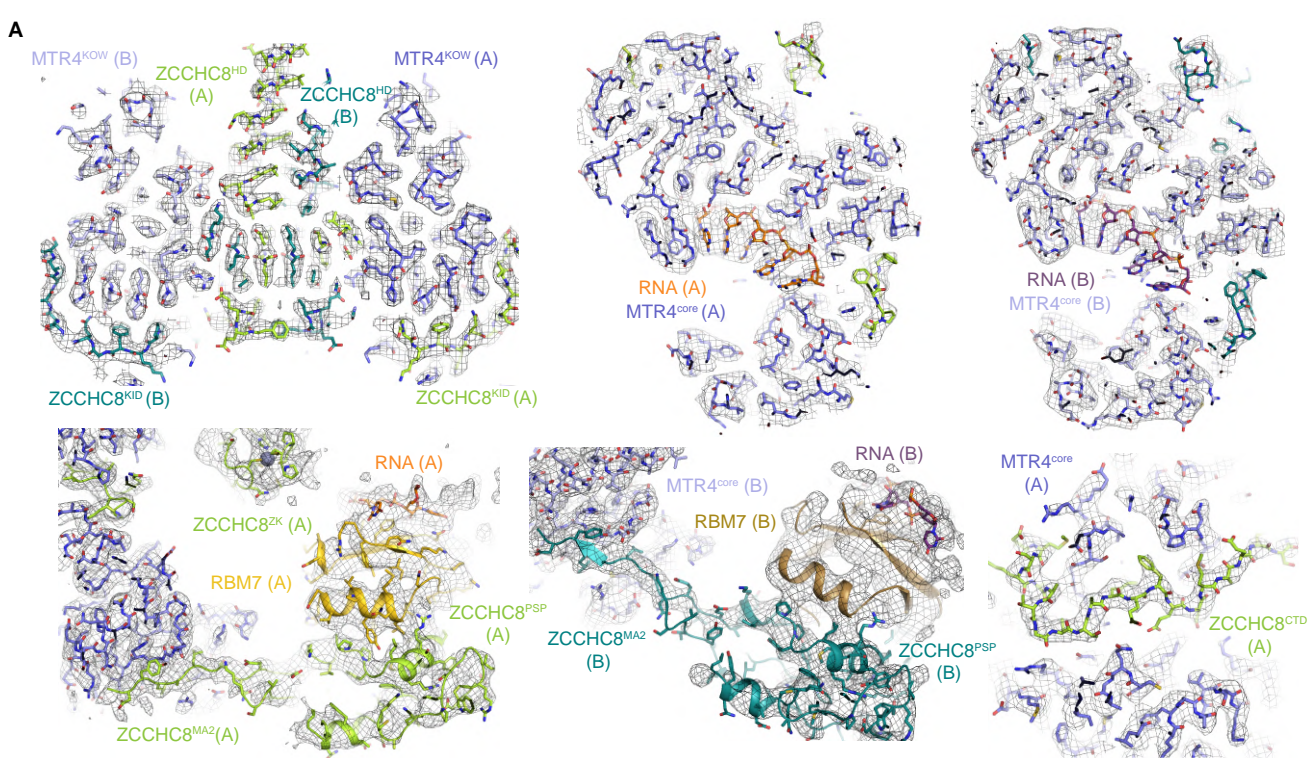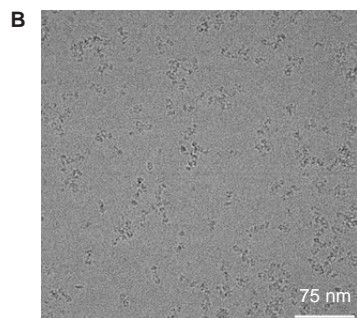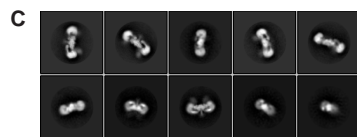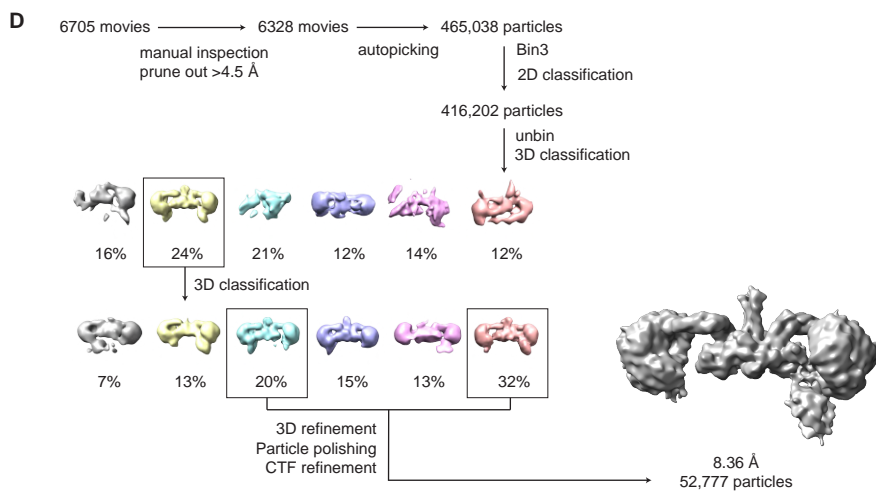

Supplement: NIHMS1799041-supplement-3.pdf [file NIHMS1799041-supplement-3.pdf]

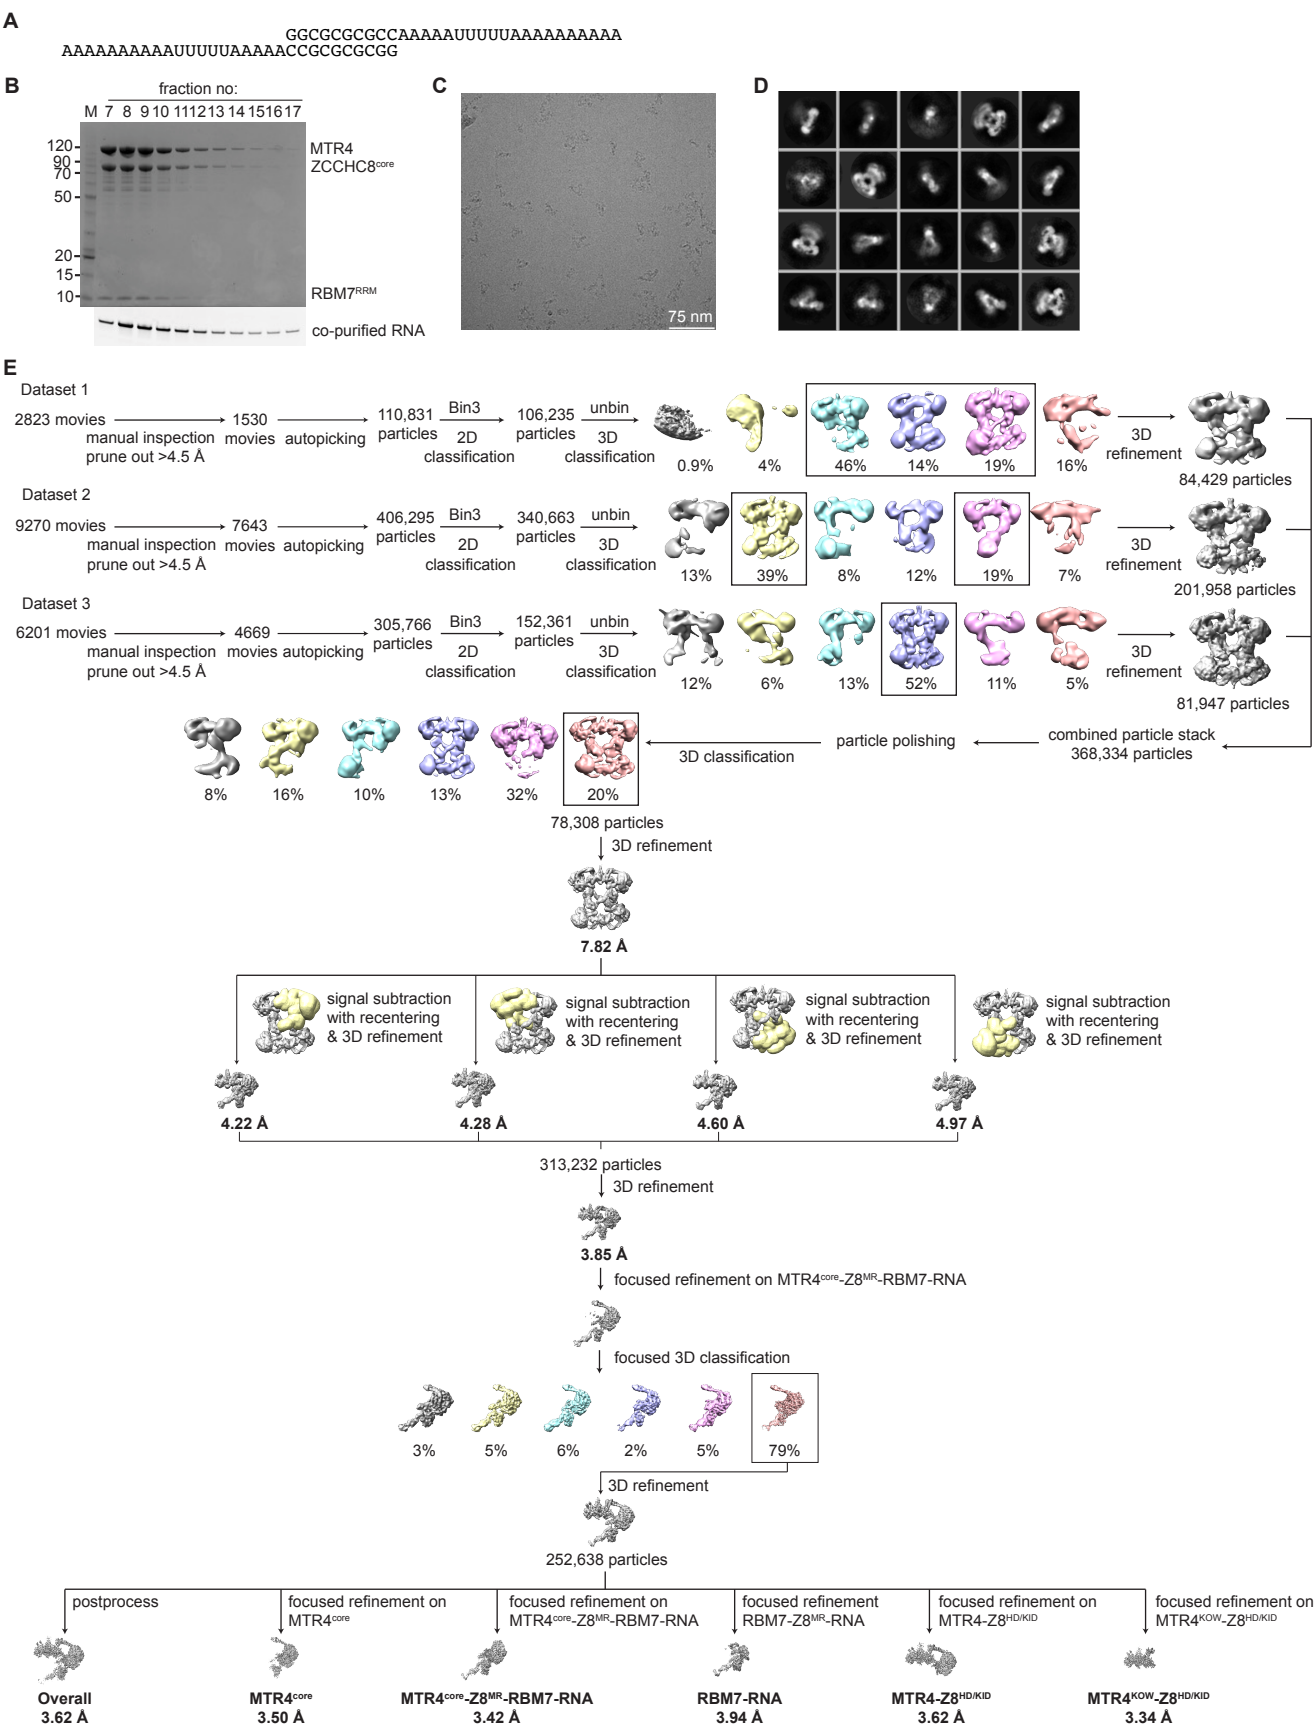

Supplement: NIHMS1799041-supplement-5.pdf [file NIHMS1799041-supplement-5.pdf]

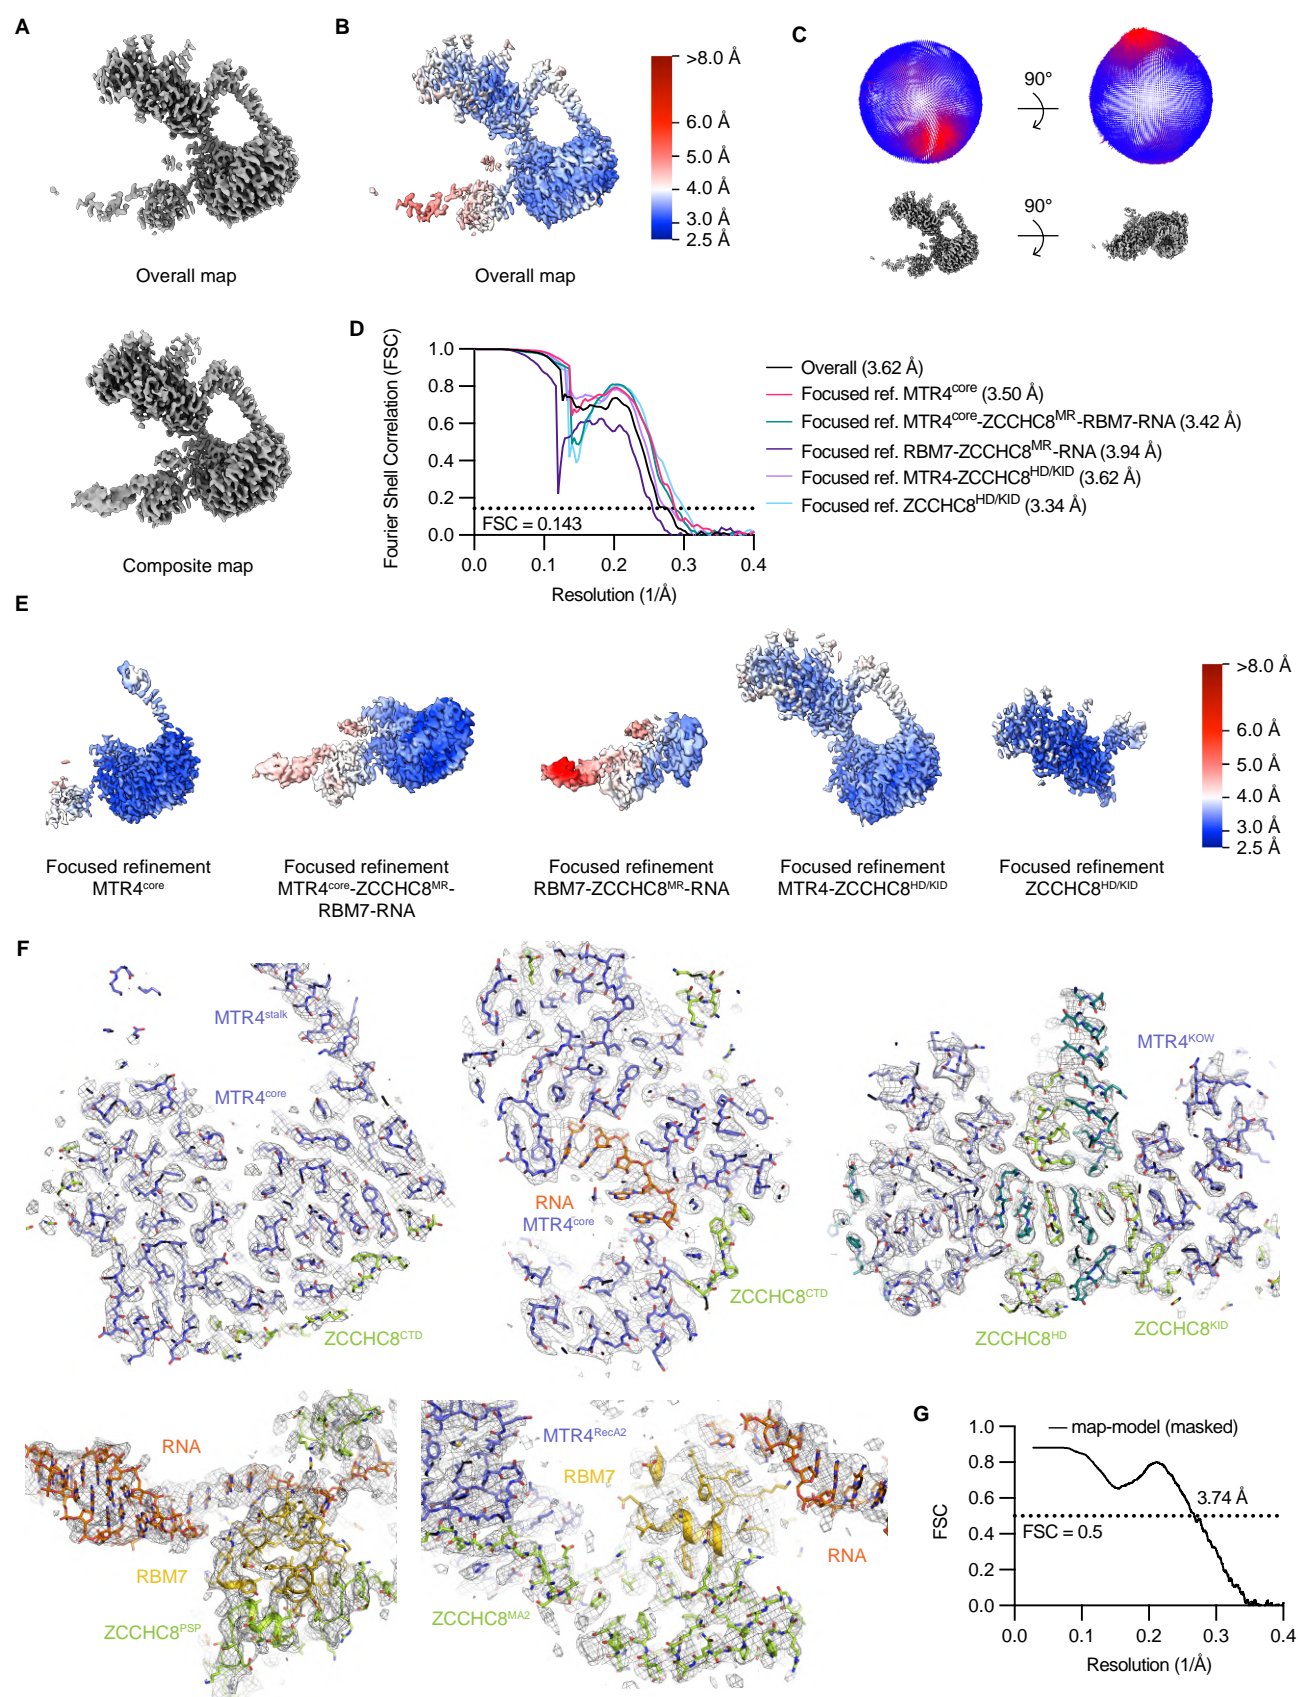

Supplement: NIHMS1799041-supplement-6.pdf [file NIHMS1799041-supplement-6.pdf]

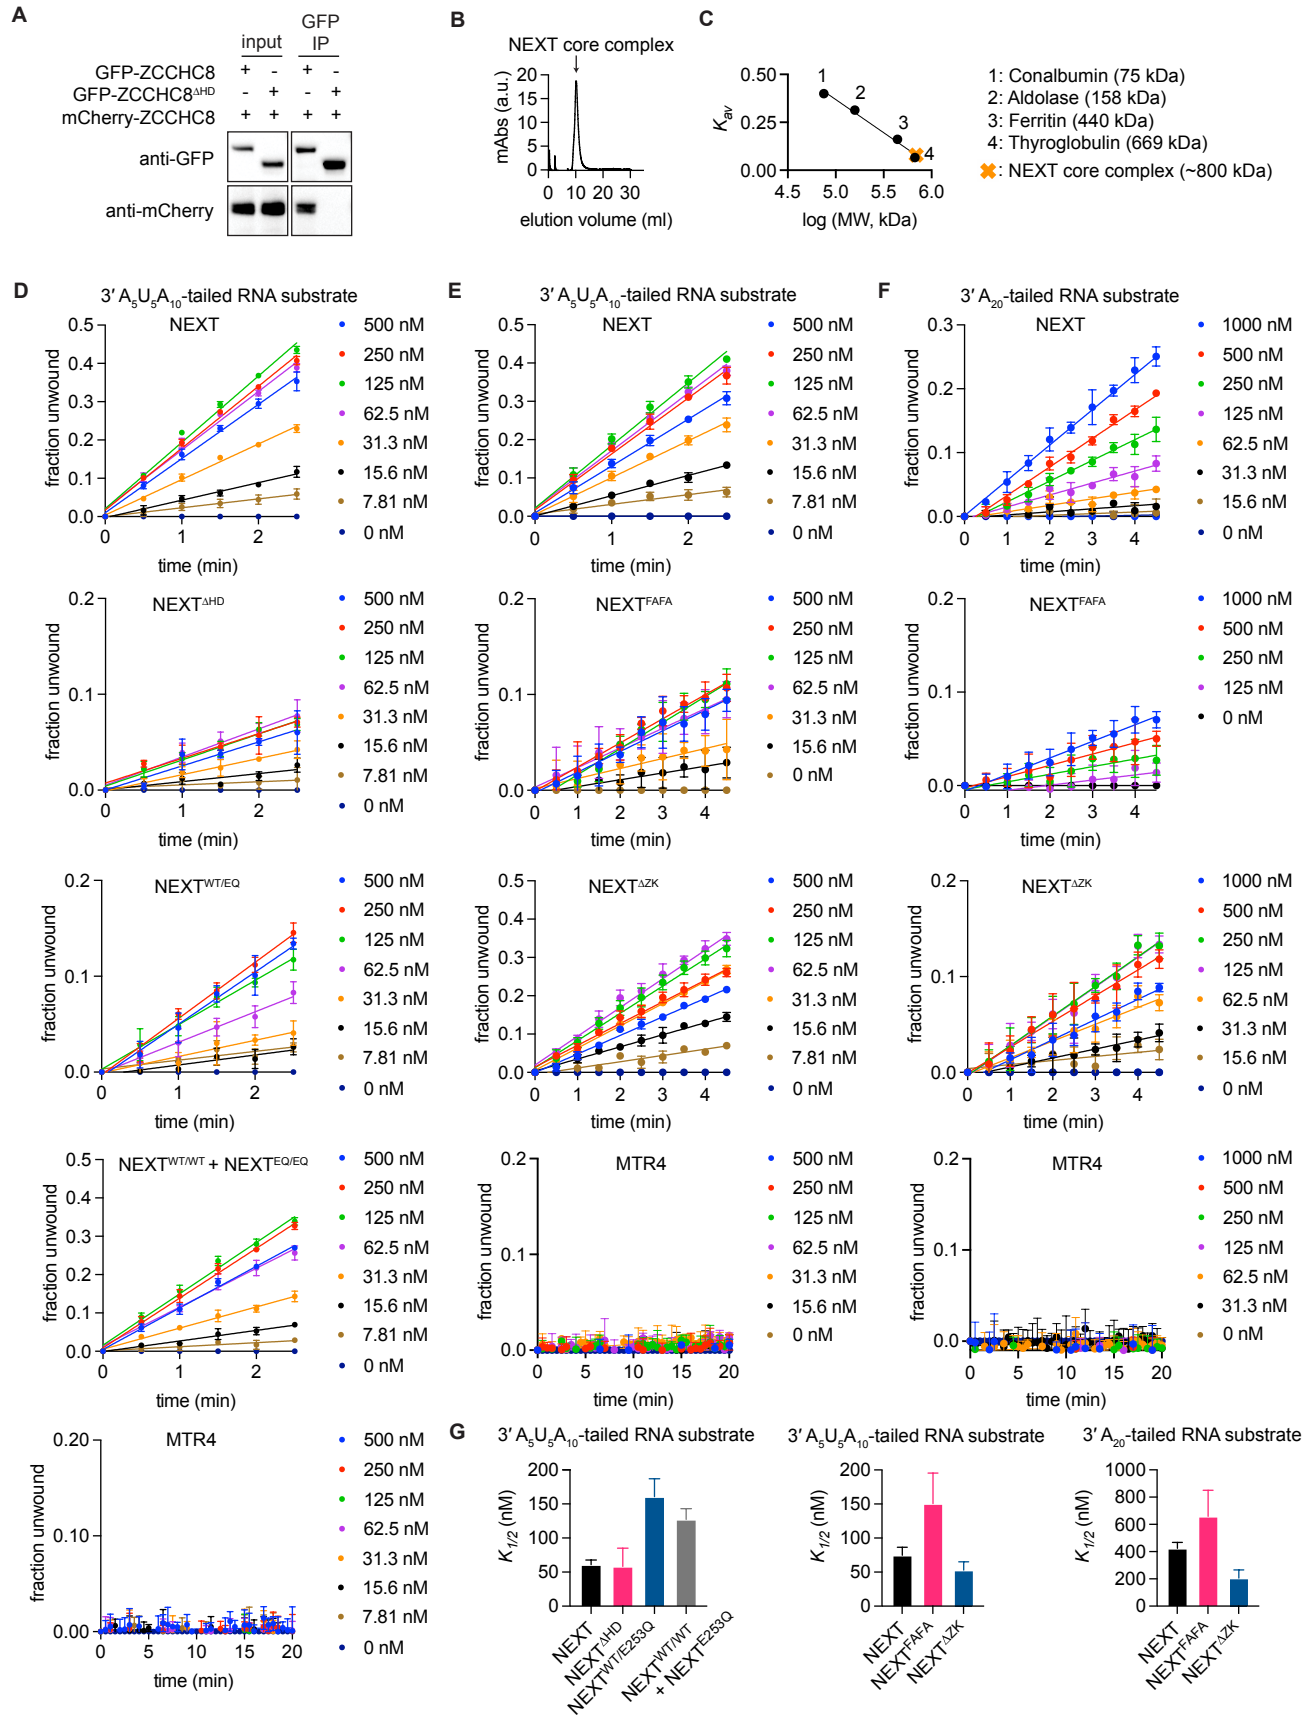

Supplement: NIHMS1799041-supplement-7.pdf [file NIHMS1799041-supplement-7.pdf]

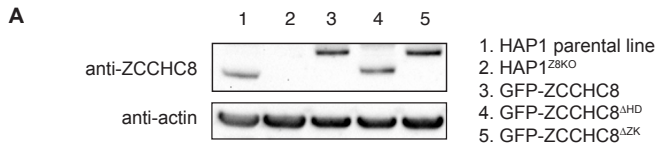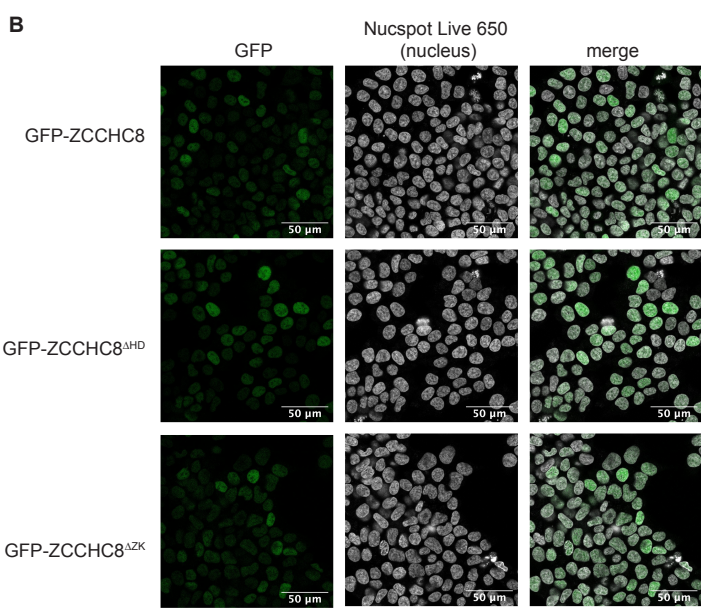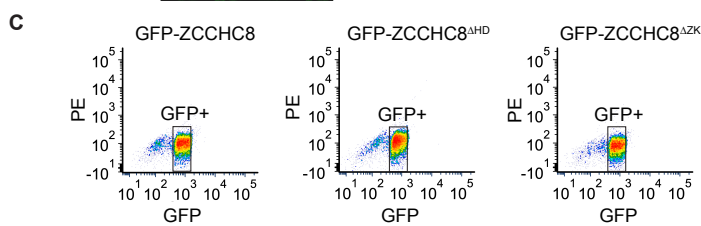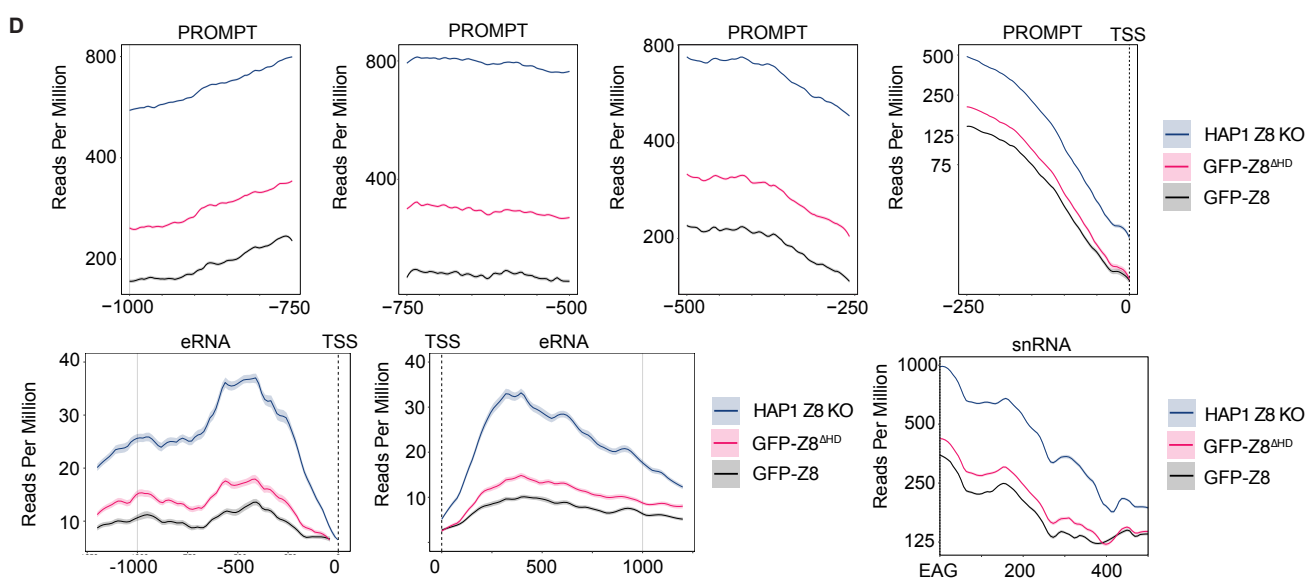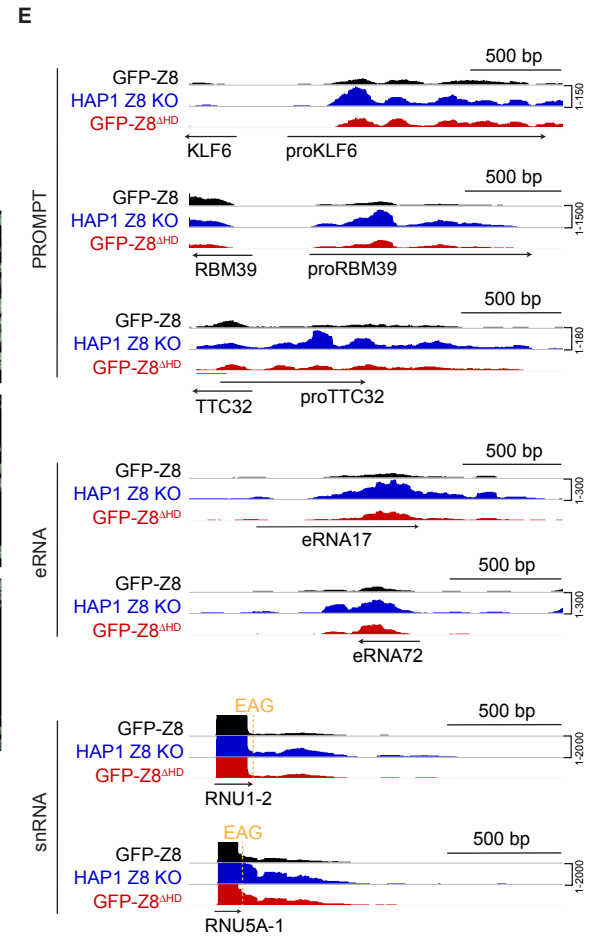

Supplement: NIHMS1799041-supplement-8.pdf [file NIHMS1799041-supplement-8.pdf]

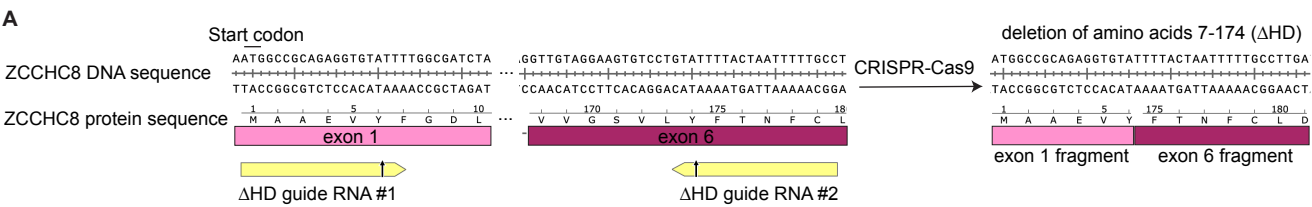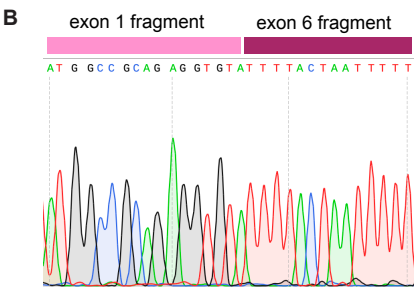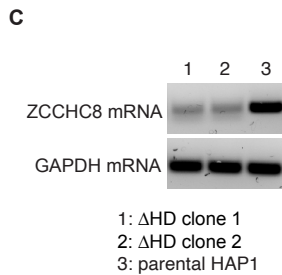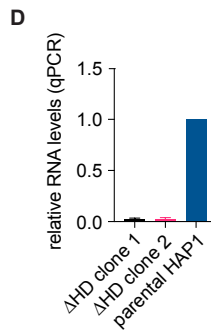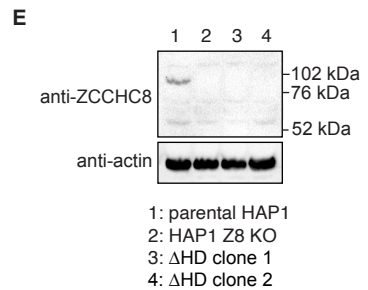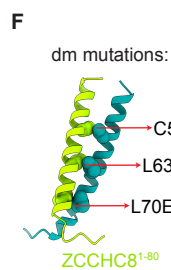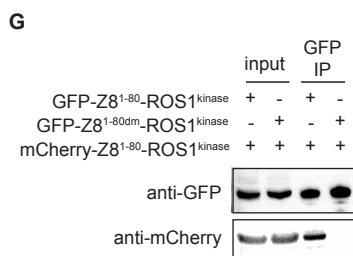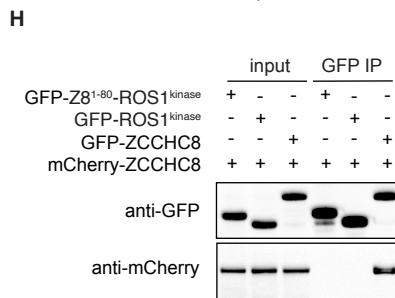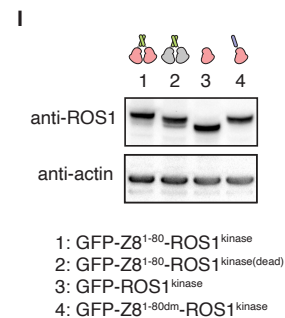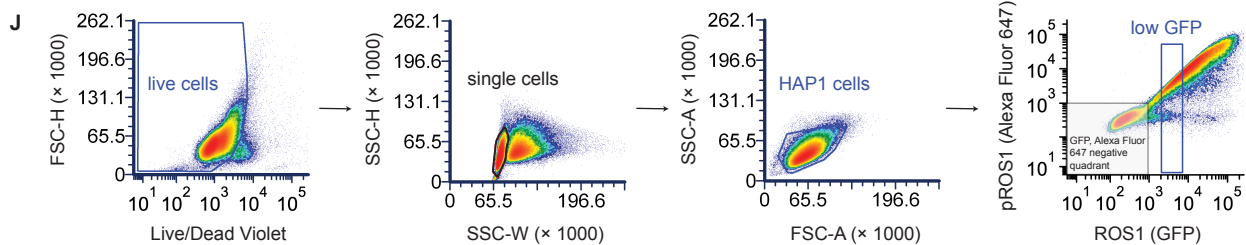

Supplement: NIHMS1799041-supplement-9.pdf [file NIHMS1799041-supplement-9.pdf]

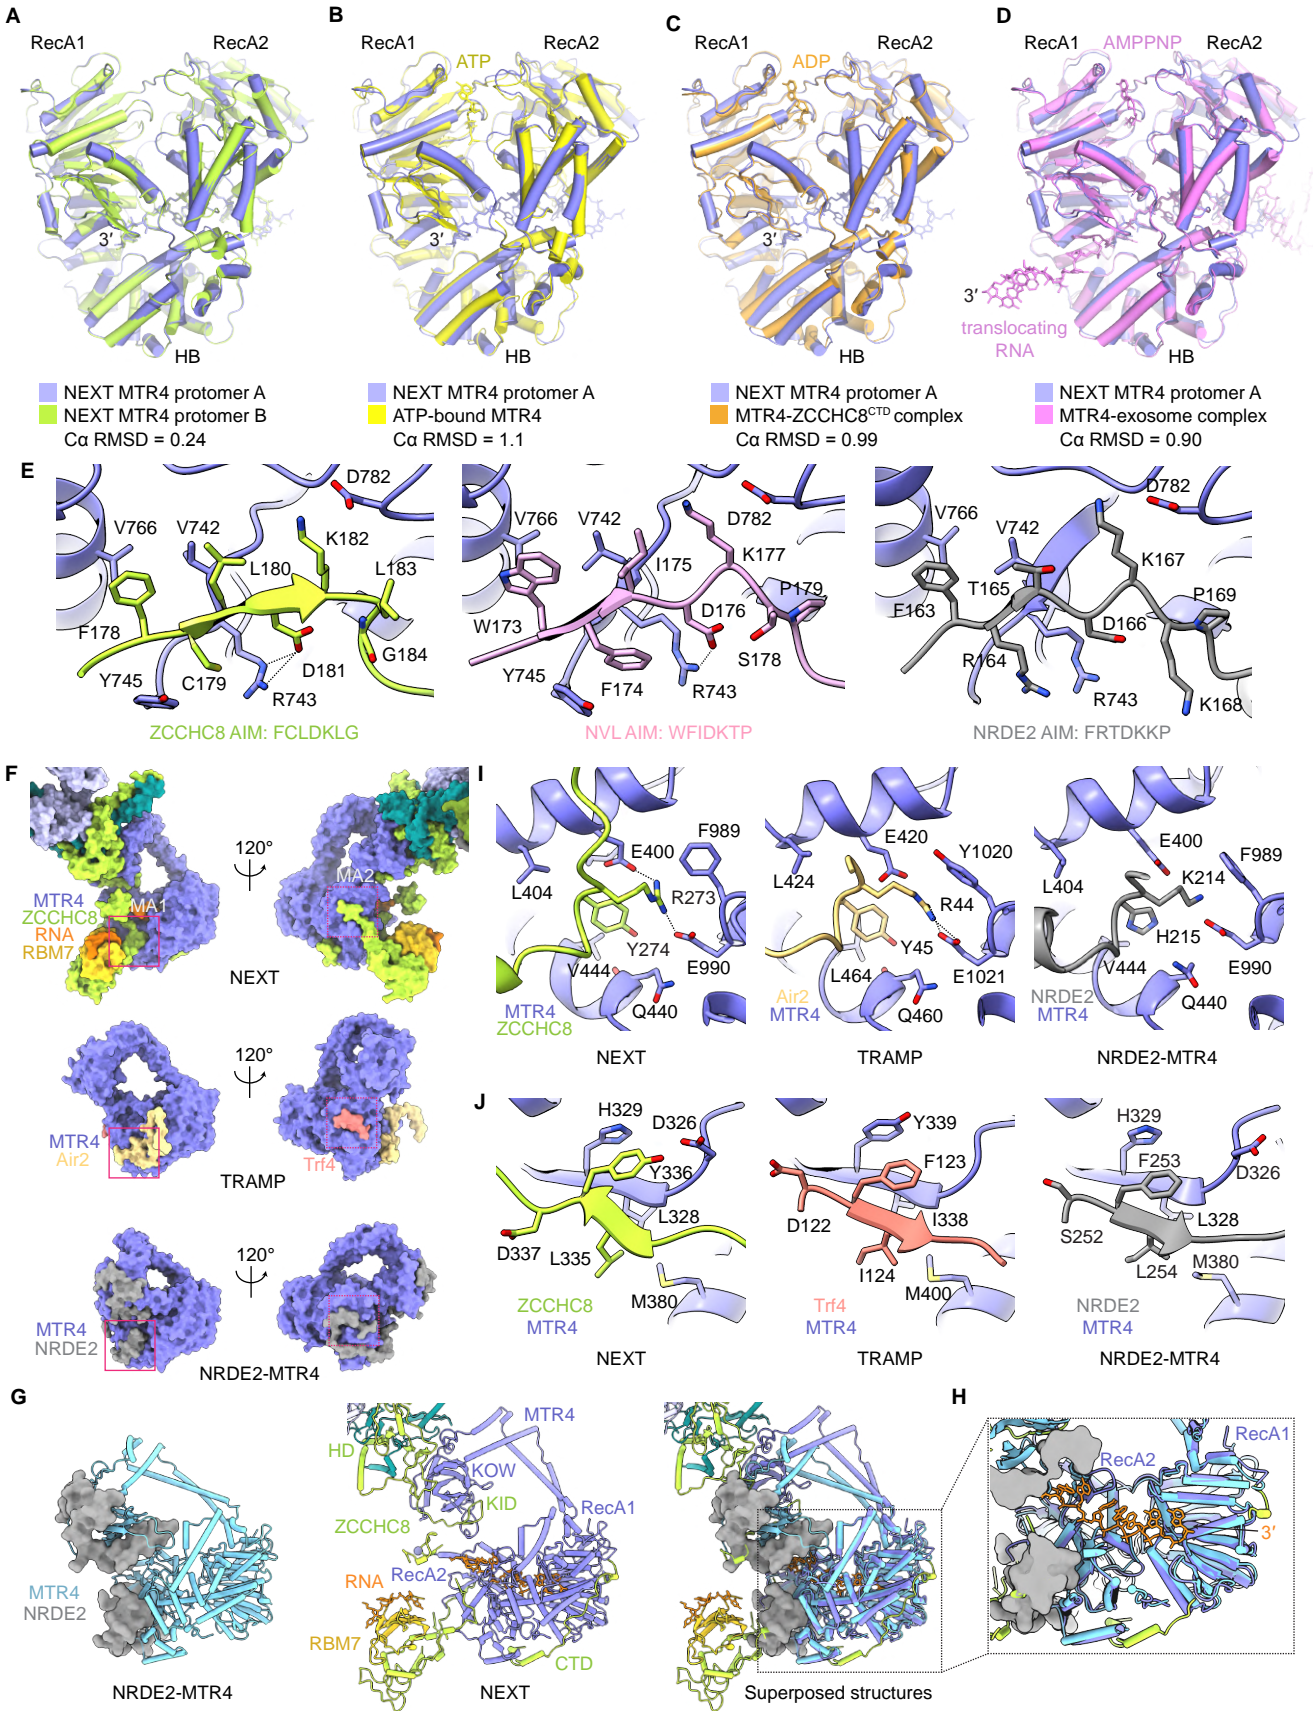

Supplement: NIHMS1799041-supplement-Figure_S4.pdf [file NIHMS1799041-supplement-Figure_S4.pdf]
